# Supplementary material for: Alterations in Gut Microbiota Are Correlated With Serum Metabolites in Patients With Insomnia Disorder
Source: PubMed Central journal article supplement (PMC8892143; doi:10.3389/fcimb.2022.722662), 2022-02-17
Supplement: Image_1.pdf [file Image_1.pdf]

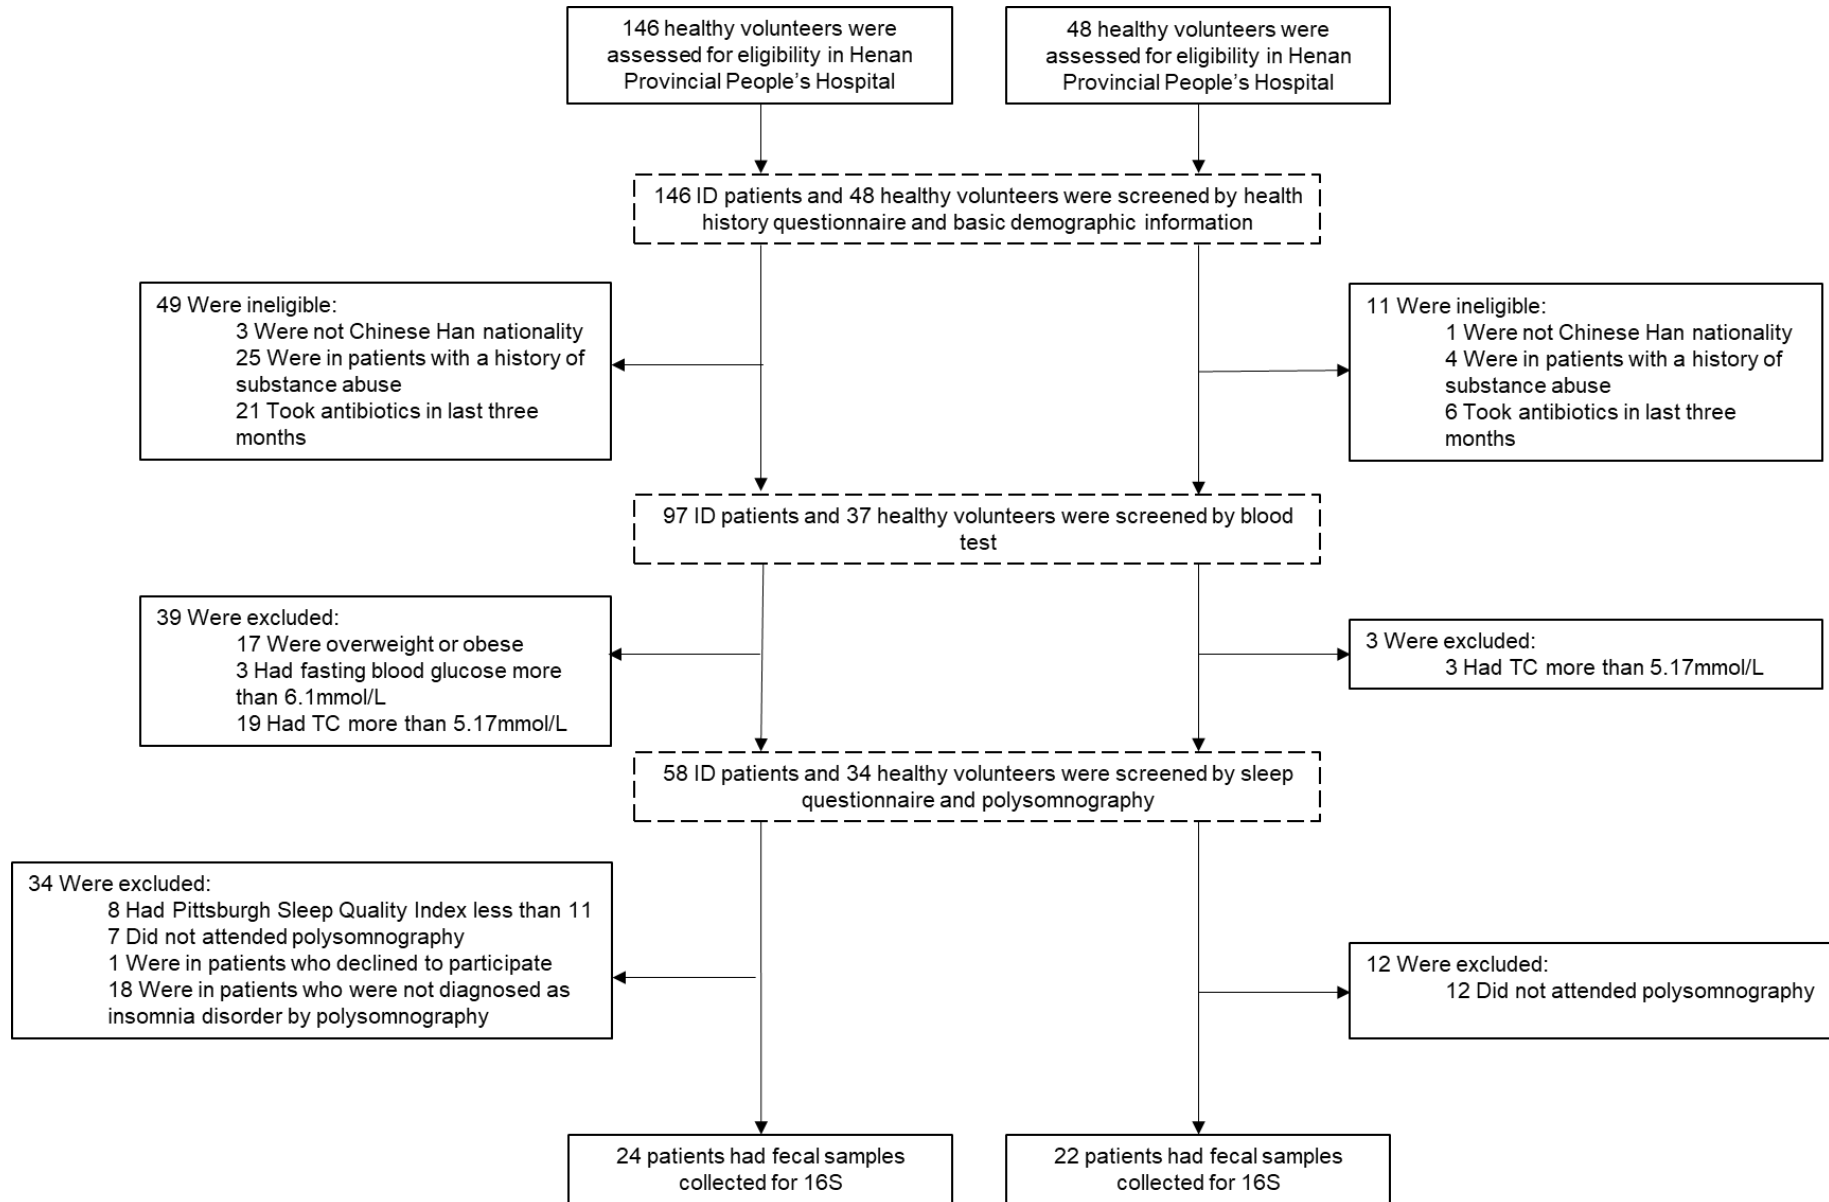

**Supplementary Figure S1.** Participants recruitment flow chart
